1 **ROCK1/Drp1-mediated aberrant mitochondrial fission is crucial for**  
2 **dopaminergic nerve cell apoptosis**

3

4 Qian Zhang<sup>1,#</sup>, Changpeng Hu<sup>1,#</sup>, Jingbin Huang<sup>1</sup>, Wuyi Liu<sup>1</sup>, Wenjing Lai<sup>1</sup>, Fanning  
5 Leng<sup>1</sup>, Qin Tang<sup>1</sup>, Yali Liu<sup>1</sup>, Qing Wang<sup>1</sup>, Min Zhou<sup>1</sup>, Fangfang Sheng<sup>1</sup>, Guobing Li<sup>1,\*</sup>  
6 and Rong Zhang<sup>1,\*</sup>

7

8 <sup>#</sup>contributed equally

9

10 \*Correspondence and requests for materials should be addressed to R.Z. (email:  
11 xqpharmacylab@126.com) or to G.L. (email: rgwlsb@126.com).

12

13 **Author list:**

14 <sup>1,#</sup>Qian Zhang, email: zhangqianb1102@163.com  
15 <sup>1,#</sup>Changpeng Hu, email: huchangpeng10@sina.com  
16 <sup>1</sup>Jingbin Huang, email: hjb20091364@126.com  
17 <sup>1</sup>Wuyi Liu, email: wuyi\_liu@126.com  
18 <sup>1</sup>Wenjing Lai, email: wenjingalai@163.com  
19 <sup>1</sup>Fanning Leng, email: lengfanning@tmmu.edu.cn  
20 <sup>1</sup>Qin Tang, email: tangqin2010@yeah.net  
21 <sup>1</sup>Yali Liu, email: lyi1988@163.com  
22 <sup>1</sup>Qing Wang, email: wqercq@163.com  
23 <sup>1</sup>Min Zhou, email: minzhou10@163.com  
24 <sup>1</sup>Fangfang Sheng, email: jeanly@163.com  
25 <sup>1,\*</sup>Guobing Li, email: rgwlsb@126.com  
26 <sup>1,\*</sup>Rong Zhang, email: xqpharmacylab@126.com

27

28 <sup>1</sup>Department of Pharmacy, The Second Affiliated Hospital of Army Medical  
29 University, Chongqing 400037, China

30

31 **Keywords:** ROCK1, Parkinson's disease, aberrant mitochondrial fission, Drp1,  
32 Inhibitor

33

34 **Abbreviations:** ATP, Adenosine triphosphate; C-Cas 3, Cleaved Caspase 3; CCCP,  
35 carbonyl cyanide m-chlorophenylhydrazone; COX IV, cytochrome c oxidase subunit  
36 IV isoform 1; C-PARP, Cleaved PARP; Cyto, cytosolic fractions; Cyto C, cytochrome  
37 c; Drp1, dynamin-related protein 1; Fis1, fission protein 1; Mito, mitochondrial  
38 lysates; i.p., intraperitoneally; L-DOPA, levodopa; Mff, mitofission factor; Mfn,  
39 mitofusin; MPP<sup>+</sup>, 1-methyl-4-phenylpyridinium ion; MPTP, 1-methyl-4-phenyl-1, 2, 3,  
40 6-tetrahydropyridine; Opa1, optic atrophy 1; PD, Parkinson's disease; ROCK1,  
41 Rho-associated coiled-coil protein kinase 1; SNpc, substantia nigra pars compacta;  
42 TH, tyrosine hydroxylase; WCL, whole-cell lysates.

43

44

45 **Abstract**

46 Dopamine deficiency caused by apoptosis of the dopaminergic nerve cells in the  
47 midbrain substantia nigra is the main pathological basis of Parkinson's disease (PD).  
48 Recent research has shown that dynamin-related protein 1 (Drp1)-mediated aberrant  
49 mitochondrial fission plays an important role in dopaminergic nerve cell apoptosis.  
50 However, the upstream regulatory mechanism remains unclear. Our study shows that  
51 knockdown of Drp1 blocked aberrant mitochondrial fission and dopaminergic nerve  
52 cell apoptosis. Importantly, we found that ROCK1 was activated in an MPP<sup>+</sup>-induced  
53 PD cell model and that ROCK1 knockdown and the specific ROCK1 activation  
54 inhibitor Y-27632 blocked Drp1-mediated aberrant mitochondrial fission and  
55 apoptosis of dopaminergic nerve cell through suppression of Drp1  
56 dephosphorylation/activation. Our *in vivo* study confirmed that Y-27632 significantly  
57 improved symptoms of a PD mouse model through inhibition of Drp1-mediated  
58 aberrant mitochondrial fission and apoptosis of dopaminergic nerve cell. Collectively,  
59 Our study suggests an important molecular mechanism of PD pathogenesis involving  
60 ROCK1-regulated dopaminergic nerve cell apoptosis via activation of Drp1-induced  
61 aberrant mitochondrial fission.

## 62 **Introduction**

63 Parkinson's disease (PD), which often occurs in elderly patients, is a  
64 neurodegenerative disease characterized by dopamine deficiency caused by  
65 nigrostriatal dopaminergic nerve cell apoptosis. With the continued aging of the  
66 population, the incidence of PD increases yearly<sup>1</sup>. As the pathogenesis remains  
67 obscure, therapeutic options of PD are mainly symptomatic therapies and levodopa  
68 (L-DOPA) remains the most effective drug since the 1960s<sup>2</sup>. However, long-term  
69 administration of L-DOPA has limited clinical applications due to the adverse side  
70 effects with long-term use<sup>3</sup>. Therefore, the molecular mechanism of nigrostriatal  
71 dopaminergic nerve cell apoptosis needs to be elucidated and is of great significance  
72 for improving therapeutic strategies for the treatment of PD.

73 Studies have found a close link between mitochondrial dysfunction and PD  
74 pathogenesis<sup>4-6</sup>. Mitochondria participate in the regulation of cellular physiological  
75 functions, including cellular homeostasis, cell growth, division, and energy  
76 metabolism, specifically as it relates to apoptosis<sup>7</sup>. Mitochondrial dysfunction is  
77 critical to PD pathogenesis, and restoration of mitochondrial function may reduce  
78 dopaminergic nerve cell apoptosis, thereby attenuating dopamine failure and  
79 improving PD symptoms<sup>8</sup>. Moreover, mitochondria are dynamic and undergo frequent  
80 fission and fusion regulated by a variety of dynamic proteins, such as dynamic-related  
81 protein 1 (Drp1), fission protein 1 (Fis1), and mitofission factor (Mff) for fission and  
82 optic atrophy 1 (Opa1) and mitofusin (Mfn) for fusion. Recent studies have shown  
83 that Drp1-induced aberrant mitochondrial fission plays an important role in the  
84 dopaminergic nerve cell apoptosis of PD. Enhanced Drp1 promotes mitochondrial  
85 fission and PD dopaminergic nerve cell apoptosis, whereas inhibited Drp1 reverses  
86 aberrant mitochondrial fission, reduces nerve cell apoptosis and improves PD

87 symptoms<sup>5,9-12</sup>. Drp1 is a GTPase; once Drp1 is activated, Drp1 translocates from the  
88 cytosol to the outer mitochondrial membrane (i.e., mitochondrial translocation), forms  
89 a ring structure around the mitochondria and changes the distance and angle of  
90 molecules, gradually compressing the mitochondria until they are fractured by GTP  
91 hydrolysis, resulting in fission of mitochondria followed by cytochrome c (Cyto C)  
92 release and caspase activation, and eventually leading to apoptosis<sup>13-16</sup>. However, the  
93 upstream regulatory mechanism of Drp1-mediated mitochondrial fission in PD has  
94 not yet been explored.

95 Rho-associated coiled-coil protein kinase 1 (ROCK1) is a member of the Ras  
96 protein family with a molecular weight of 160 kDa, and plays important regulatory  
97 role in cancer cell growth and survival, as well as invasion and metastasis of  
98 neoplasm<sup>17</sup>. In the field of cancer research, ROCK1 has been reported to be cleaved  
99 into activated ROCK1 with a molecular weight of 130 kDa through proteolytic  
100 cleavage of its C-terminal auto-inhibitory domain, which eventually leads to  
101 apoptosis<sup>18</sup>. Importantly, activated ROCK1 has been found to play an important role  
102 in regulating mitochondrial fission via dephosphorylation/activation of Drp1 in  
103 human breast cancer cells<sup>19</sup>. Additionally, there are also reports in the central nervous  
104 system that the specific ROCK1 activation inhibitor Y-27632 decreases dopaminergic  
105 nerve cell death in mice and primary neuron-glia cultures<sup>20,21</sup>, but the mechanisms  
106 remain elusive. Based on the above, we propose that ROCK1 may be involved in the  
107 pathogenesis of PD as an important upstream regulator of Drp1.

108 In the present study, we confirm that Drp1-mediated aberrant mitochondrial

109 fission participates in the pathogenesis of PD. Furthermore, we evaluated the role of  
110 ROCK1 in regulating dopaminergic nerve cell apoptosis in PD. We found that  
111 ROCK1 is activated in PD, and ROCK1 knockdown or pretreatment with the ROCK1  
112 activation inhibitor Y-27632 inhibits Drp1-mediated aberrant mitochondrial fission  
113 and dopaminergic nerve cell apoptosis *in vitro* and *in vivo*, as well as significantly  
114 improves PD symptoms in a mouse model. Our mechanistic studies revealed that  
115 activated ROCK1 promotes dopaminergic nerve cell apoptosis through  
116 dephosphorylation/activation of Drp1, resulting in aberrant mitochondrial fission, and  
117 eventually leading to PD. Furthermore, we identified the therapeutic effect of  
118 Y-27632 on a PD mouse model by suppressing Drp1-mediated aberrant mitochondrial  
119 fission and dopaminergic nerve cell apoptosis. Our study contributes to a novel  
120 insight into the pathogenesis of PD involving dopaminergic nerve cell apoptosis, and  
121 provides a mechanistic basis for the promotion of ROCK1 activation inhibitor  
122 applying in the treatment of PD.

123

## 124 **Results**

125 **MPP<sup>+</sup> inhibits dopamine release in PD cells.** Degeneration of nigrostriatal  
126 dopaminergic nerve cells in PD can be modeled by the administration of the  
127 neurotoxin 1-methyl-4-phenylpyridinium ion (MPP<sup>+</sup>) *in vitro*<sup>12</sup>. In this study, we used  
128 MPP<sup>+</sup>-treated dopaminergic neuron PC12 cells as a model of PD *in vitro*. First, we  
129 evaluated the effects of MPP<sup>+</sup>-induced dopamine loss in PC12 cells using ELISAs. As  
130 shown in Fig. 1, exposure of PC12 cells to MPP<sup>+</sup> resulted in a significant decrease in  
131 dopamine production in a dose-dependent manner. This result confirms that the *in*  
132 *vitro* model of PD was successfully established.

133

134 **MPP<sup>+</sup> induces mitochondria-dependent apoptosis in PC12 cells.** To further  
135 explore the pathogenesis in the MPP<sup>+</sup>-induced PD model, we first studied the effect of  
136 MPP<sup>+</sup> on cell viability as measured by the MTT assay. PC12 cells were treated with  
137 MPP<sup>+</sup> at different concentrations and different time intervals. Our results showed that  
138 MPP<sup>+</sup> resulted in significant decreases in cell viability of PC12 cells in dose- and  
139 time-dependent manners (Fig. 2a, b).

140 ATP, as the most important energy molecule, plays a crucial role in the cellular  
141 physiological and pathogenic processes. ATP depletion is always an indicator of  
142 mitochondrial dysfunction<sup>22-24</sup>. As shown in Fig. 2c, the content of ATP rapidly  
143 decreased in the MPP<sup>+</sup>-treated cells in a dose-dependent manner. The loss of  
144 mitochondrial membrane potential is also another indicator of mitochondrial  
145 dysfunction<sup>25,26</sup>. Therefore, we examined the mitochondrial membrane potential using

146 JC-1 and rhodamine 123 staining. The mitochondrial membrane potential of the cells  
147 using JC-1 staining is represented by the ratio of JC-1 aggregates (red) to JC-1  
148 monomers (green) fluorescence intensities. CCCP was used as a positive control. Our  
149 results show that MPP<sup>+</sup> dose-dependently decreased red fluorescence intensities and  
150 increased green fluorescence intensities and that the ratio of red to green fluorescence  
151 intensities decreased significantly (Fig. 3d). Rhodamine 123, which is specifically  
152 located on mitochondria, is also widely used to detect mitochondrial membrane  
153 potential based on fluorescence intensity<sup>27</sup>. Our results show that cells treated with  
154 MPP<sup>+</sup> caused dose-dependent decreases in the fluorescence intensity of rhodamine  
155 123 (Fig. 2e). Collectively, both the decrease of ATP concentration and depletion of  
156 mitochondrial membrane potential suggest that MPP<sup>+</sup> induces mitochondrial  
157 dysfunction in PC12 cells.

158 Mitochondrial dysfunction is an important indicator of mitochondria dependent  
159 apoptosis<sup>28-30</sup>. To investigate whether the MPP<sup>+</sup>-mediated mitochondrial dysfunction  
160 result in the induction of apoptosis, we used flow cytometry (Annexin V-FITC<sup>+</sup>/PI<sup>-</sup>) to  
161 identify apoptotic cells. We found that MPP<sup>+</sup> led to a dose-dependent increase in the  
162 percentage of apoptotic cells (Fig. 2f). Consistent with these findings, MPP<sup>+</sup> caused  
163 cleavage/activation of classical apoptosis-related proteins, such as caspase 3 and  
164 PARP (Fig. 2g). Taken together, these findings suggest that MPP<sup>+</sup> induces  
165 mitochondria-dependent apoptosis in PC12 cells

166

167 **MPP<sup>+</sup> induces aberrant mitochondrial fission in PC12 cells.** Increasing evidence



168 indicates that mitochondrial fission participates in the initiation of mitochondrial  
169 apoptosis<sup>29,30</sup>. To exam the effects of MPP<sup>+</sup> on mitochondrial fission, the DsRed-Mito  
170 plasmid was transfected into cells before MPP<sup>+</sup> treatment. Confocal laser scanning  
171 microscopy studies indicated that the average length of mitochondria was remarkably  
172 decreased in MPP<sup>+</sup>-treated cells in a dose-dependent manner (Fig. 3a, b). These  
173 results reveal that MPP<sup>+</sup> induces mitochondrial apoptosis via mitochondrial fission in  
174 PC12 cells.

175

#### 176 **MPP<sup>+</sup> induces Drp1-dependent aberrant mitochondrial fission and apoptosis.**

177 Mitochondria are dynamic organelles, which undergo frequent fission and fusion.  
178 Dynamin-related protein 1 (Drp1) is responsible for mitochondrial fission through its  
179 translocation from the cytosol to mitochondria (i.e., mitochondrial translocation)<sup>29,31,32</sup>.  
180 Therefore, we next investigated whether mitochondrial translocation of Drp1 is a key  
181 event in MPP<sup>+</sup>-induced mitochondrial fission. Exposure of PC12 cells to MPP<sup>+</sup>  
182 resulted in a significant increase in the levels of Drp1 in mitochondria and decrease in  
183 the cytosol in a dose dependent manner (Fig. 4a). To further verify the critical  
184 function of Drp1 on MPP<sup>+</sup>-induced aberrant mitochondrial fission in a PD cell culture  
185 model, lentiviral shDrp1 was used to specifically suppress the expression of Drp1 (Fig.  
186 4b). Confocal laser scanning microscopy demonstrated that knockdown of Drp1  
187 significantly increased the average length of mitochondria, suggesting that Drp1  
188 knockdown inhibited MPP<sup>+</sup>-induced aberrant mitochondrial fission (Fig. 4c, d).  
189 Depletion of Drp1 attenuated MPP<sup>+</sup>-induced ATP loss compared to transfection with

190 shCon (Fig. 4e). Moreover, Drp1 knockdown blocked MPP<sup>+</sup>-induced activation of  
191 caspase 3 and PARP as well as apoptosis (Fig. 4f, g). Taken together, these findings  
192 indicate that Drp1 is required for MPP<sup>+</sup>-induced aberrant mitochondrial fission and  
193 apoptosis.

194

195 **ROCK1 activation is involved in MPP<sup>+</sup>-induced aberrant mitochondrial fission**  
196 **and apoptosis through dephosphorylation/activation of Drp1.** ROCK1 has been  
197 reported to play an important regulatory role in apoptosis<sup>17,18</sup>. Our results revealed  
198 that MPP<sup>+</sup> resulted in a significant decrease in the expression of ROCK1 and increase  
199 in the expression of cleaved ROCK1 (CF: cleavage fragment) in a dose-dependent  
200 manner (Fig. 5a). ROCK1 activation is reportedly involved in the regulation of  
201 mitochondrial translocation of Drp1 and mitochondrial fission through its  
202 dephosphorylation at Ser 637 in human breast cancer cells<sup>19</sup>. As shown in Fig. 5b, the  
203 serine phosphorylation site is highly conserved among species and is located at the  
204 GTPase effector domain (GED) of Drp1, which suggests that Ser 656/600 in  
205 rat/mouse corresponds to Ser 637 in human due to the consensus sequence motif of  
206 ROCK substrates (R-X-X-S where R is arginine and S is serine)<sup>33</sup>. Thus, we identified  
207 Ser 656 in the rat Drp1 as a potential phosphorylation site for ROCK1 and next  
208 examined whether MPP<sup>+</sup> had an effect on the phosphorylation state of rat Drp1 at Ser  
209 656 in PC12 cells. A dose-dependent decrease in the level of p-Drp1 at Ser 656 (i.e.,  
210 increase in dephosphorylation at Ser 656) was detected in the cells exposed to MPP<sup>+</sup>  
211 (Fig. 5c). To further confirm these findings, we stably knocked down ROCK1 using a

212 lentivirus shRNA approach (Fig. 5d). We next investigated whether ROCK1  
213 activation was required for Drp1 translocation to mitochondria mediated by MPP<sup>+</sup>.  
214 ROCK1 knockdown reversed Drp1 mitochondrial translocation and  
215 dephosphorylation at Ser 656 (Fig. 5e). ROCK1 knockdown also blocked  
216 MPP<sup>+</sup>-mediated mitochondrial fission (Fig. 5f, g). Furthermore, knockdown of  
217 ROCK1 attenuated MPP<sup>+</sup>-induced ATP loss, caspase 3 and PARP activation, and  
218 apoptosis (Fig. 5h-j). Taken together, these results suggest that activated ROCK1 is  
219 involved in MPP<sup>+</sup>-induced aberrant mitochondrial fission and apoptosis through Drp1  
220 dephosphorylation at Ser 656 in a PD cell culture model.

221

222 **The ROCK1 activation inhibitor Y-27632 attenuates MPP<sup>+</sup>-induced**  
223 **Drp1-dependent aberrant mitochondrial fission and apoptosis through inhibition**  
224 **of Drp1 dephosphorylation/activation.** To further verify the critical role of the  
225 activated ROCK1 in MPP<sup>+</sup>-induced mitochondrial fission and apoptosis, we used  
226 Y-27632, a potent ROCK1 activation inhibitor. Preincubation of cells with Y-27632  
227 before MPP<sup>+</sup> treatment remarkably inhibited MPP<sup>+</sup>-induced ROCK1 activation, Drp1  
228 dephosphorylation (Ser 656) and Drp1 mitochondrial translocation (Fig. 6a-c).  
229 Y-27632 also significantly blocked the MPP<sup>+</sup>-mediated mitochondrial fission (Fig. 6d,  
230 e). Furthermore, Y-27632 markedly decreased MPP<sup>+</sup>-induced activation of caspase 3  
231 and PARP, as well as apoptosis (Fig. 6f, g). Collectively, our results confirmed that  
232 activated ROCK1 plays a critical role in MPP<sup>+</sup>-induced Drp1-dependent  
233 mitochondrial fission and apoptosis in PD cell culture models.

234 **The ROCK1 activation inhibitor Y-27632 improves symptoms in MPTP-induced**  
235 **PD mice through inhibiting Drp1-dependent aberrant mitochondrial fission and**  
236 **apoptosis.** To verify whether our *in vitro* findings would be operative *in vivo*, we  
237 injected C57BL/6 mice with 1-methyl-4-phenyl-1, 2, 3, 6-tetrahydropyridine (MPTP,  
238 30 mg/kg/day, intraperitoneally (i.p.)) for five consecutive days to model PD in mice.  
239 The mice in the Y-27632+MPTP group were injected with the specific ROCK1  
240 inhibitor Y-27632 (5 mg/kg/day, i.p.) 30 min before MPTP treatment. Y-27632  
241 remarkably inhibited MPTP-induced cleavage/activation of ROCK1 both in the  
242 substantia nigra pars compacta (SNpc) and striatum of mice (Fig. 7a). As shown in  
243 Fig. 7b, the latency of MPTP-induced PD mice to fall from the rotarod was  
244 significantly decreased, but pretreatment with Y-27632 before MPTP treatment  
245 rescued this decrease. Immunohistochemical analysis indicated that MPTP treatment  
246 resulted in a significant decrease in the number of tyrosine hydroxylase (TH, as a  
247 marker for dopamine nerve cell)-positive cells, whereas Y-27632 reversed these  
248 changes (Fig. 7c, d). The results of TH expression detected by western blot analysis  
249 were consistent with that of immunohistochemical staining (Fig. 7e). All of these  
250 findings suggest that our MPTP-induced PD mouse model was successfully  
251 established and that inhibition of ROCK1 activation using Y-27632 can protect  
252 dopamine nerve cells from the MPTP-mediated dopamine depletion in this *in vivo*  
253 model.

254 We next examined the mechanism underlying PD *in vivo*. Immunohistochemical  
255 and western blot analysis showed that injection with Y-27632 before MPTP

256 significantly inhibited the MPTP-mediated activation of caspase 3 and PARP (Fig. 7f,  
257 g). We also demonstrated that Y-27632 significantly decreased MPTP-mediated  
258 dephosphorylation of Drp1 (Ser 600) in the mouse (corresponding to Ser 637 in  
259 human, Fig. 5B) (Fig. 7h). Similarly, western blot analysis was also used to further  
260 confirm that Y-27632 attenuated MPTP-induced Drp1 (Ser 600) dephosphorylation  
261 and subsequently its mitochondrial translocation (Fig. 7i, j). Taken together, our  
262 findings indicate neuroprotective effects of an inhibitor of ROCK1 activation on an  
263 MPTP-induced mouse model of PD through inhibition of Drp1-dependent aberrant  
264 mitochondrial fission and apoptosis, suggesting ROCK1 and Drp1 may be potential  
265 therapeutic target for PD.

266

## 267 **Discussion**

268 In the present study, we demonstrated for the first time that ROCK1 promotes  
269 dopaminergic nerve cell apoptosis through activating Drp1-mediated aberrant  
270 mitochondrial fission *in vitro* and *in vivo*. We also confirmed that the ROCK1  
271 activation inhibitor Y-27632 has a therapeutic effect on a PD mouse model by  
272 suppressing Drp1-mediated aberrant mitochondrial fission and dopaminergic nerve  
273 cell apoptosis. Our findings provide a mechanistic basis for the promotion of ROCK1  
274 activation inhibitor applying in the treatment of PD.

275 Currently, neurotoxic models are broadly used as models of PD<sup>34</sup>. The  
276 dopaminergic neurotoxin MPTP (active metabolite: MPP<sup>+</sup>) originates from  
277 discoveries in the early 1980s and has been used extensively to generate animal  
278 models of PD (Davis et al. 1979; Langston et al. 1983<sup>35,36</sup>). MPTP contributes to the  
279 etiopathogenesis of PD by inducing mitochondria-targeted injury, decreasing  
280 dopamine levels, TH activity, and eliciting dopaminergic nerve cell apoptosis<sup>12</sup>. Given  
281 the parallels with PD, in this study, we examined the molecular mechanisms  
282 underlying dopaminergic nerve cell apoptosis using MPP<sup>+</sup> and MPTP-induced cell  
283 and animal models of PD *in vitro* and *in vivo*, respectively<sup>37</sup>. Increasing evidence  
284 indicates that mitochondrial protein Drp1 is required for mitochondrial fission and  
285 MPP<sup>+</sup>-induced neurotoxicity<sup>12,29,32</sup>. Our results also demonstrate that knockdown of  
286 Drp1 significantly inhibited MPP<sup>+</sup>-induced aberrant mitochondrial fission and nerve  
287 cell apoptosis. Once Drp1 is activated, it translocates from the cytosol to the outer  
288 mitochondrial membrane and forms a ring structure around the mitochondria,

289 resulting in fission of mitochondria followed by Cyto C release and caspase activation,  
290 eventually leading to apoptosis<sup>38</sup>. Additionally, dephosphorylation/activation of Drp1  
291 at Ser 637 in human has been showed to promote its translocation from the cytosol to  
292 mitochondria and mitochondrial fission<sup>19,29,39,40</sup>. Consistent with these reports, our  
293 data revealed that dephosphorylated Drp1 at Ser 656/600 (rat/mouse) (corresponding  
294 to Ser 637 in human Drp1 isoform 1) increased mitochondrial translocation of Drp1  
295 and leads to mitochondrial fission and nerve cell apoptosis in both *in vitro* and *in vivo*  
296 models of PD.

297 ROCK1 plays a central role in the regulation of cell adhesion, migration,  
298 proliferation and apoptosis<sup>41</sup>. ROCK1 is highly expressed in a variety of cancer  
299 tissues<sup>42</sup>, and plays an important role in the regulation of apoptosis in various types of  
300 cancer cells<sup>43</sup>. In human breast cancer cells, Drp1 has been reported to be an  
301 important ROCK1 substrate, and the dephosphorylation of Drp1 induced by ROCK1  
302 stimulates its mitochondrial fission activity<sup>19</sup>. Moreover, the specific ROCK1  
303 activation inhibitor Y-27632 has also been reported to be able to inhibit dopaminergic  
304 nerve cell death in the PD substantia nigra<sup>21</sup>. According to our findings,  
305 Drp1-mediated aberrant mitochondrial fission is more likely to act downstream of  
306 ROCK1 during dopaminergic nerve cell apoptosis in PD based on the following  
307 evidences. First, activation/cleavage of ROCK1 and dephosphorylation/activation of  
308 Drp1 were found in our PD models. Second, knockdown of ROCK1 remarkably  
309 decreased MPP<sup>+</sup>-induced dephosphorylation of Drp1, mitochondrial translocation of  
310 Drp1, aberrant mitochondrial fission and nerve cell apoptosis. Third, the ROCK1

311 activation inhibitor Y-27632 significantly improved symptoms of PD mice through  
312 inhibition of Drp1-mediated aberrant mitochondrial fission and dopaminergic nerve  
313 cell apoptosis. Taken together, our study reveals that ROCK1 plays a crucial role in  
314 the regulation of dopaminergic nerve cell apoptosis of PD via  
315 dephosphorylation/activation of Drp1-mediated aberrant mitochondrial fission.

316 In summary, the present findings indicate an important molecular mechanism of  
317 PD pathogenesis involving ROCK1-regulated dopaminergic nerve cell apoptosis.  
318 Importantly, a mechanism is also proposed for the first time by which ROCK1  
319 cleavage/activation activates downstream Drp1 by dephosphorylation of Drp1 and  
320 subsequently induces aberrant mitochondrial fission, eventually resulting in  
321 nigrostriatal dopaminergic nerve cell apoptosis and decreasing dopamine release.  
322 Collectively, our findings contribute to a better understanding of PD pathogenesis and  
323 also provide a mechanistic basis for the promotion of ROCK1 activation inhibitor  
324 applying in the treatment of PD.

325



## 326 **Materials and Methods**

327 **Reagents.** 1-methyl-4-phenyl-1, 2, 3, 6-tetrahydropyridine hydrochloride (MPTP-HCl,  
328 M0896) and 1-methyl-4-phenylpyridinium iodide (MPP<sup>+</sup>I<sup>-</sup>, D048) were purchased  
329 from Sigma-Aldrich Co. (St. Louis, MO, USA). Y-27632 (sc-216067) was obtained  
330 from Santa Cruz Biotechnology (Santa Cruz, CA).

331

332 **Cell lines and cell culture.** PC12 cells were provided by the American Type Culture  
333 Collection (ATCC, Manassas, VA, USA). PC12 cells were cultured in RPMI-1640  
334 medium supplemented with 10% (v/v) fetal bovine serum (FBS, Gibco, 10100) at  
335 37 °C with 5% CO<sub>2</sub> and 95% air in a humidified atmosphere.

336

337 **Plasmid constructs and lentiviral gene transfer.** Drp1 shRNA (target sequence:  
338 5'-CCGGGCTACTTTACTCCAACCTTATTCTCGAGAATAAGTTGGAGTAAAGT  
339 AGCTTTTT-3') and ROCK1 shRNA (target sequence:  
340 5'-CCGGCGGTTAGAACAAGAGGTAAATCTCGAGATTTACCTCTTGTTCTAA  
341 CCGTTTTT-3') were subcloned into the pLKO.1 plasmid to construct shDrp1 and  
342 shROCK1 plasmid, respectively. Control shRNA plasmid (pLKO.1-puro plasmid,  
343 sc-108060) was purchased from Santa Cruz Biotechnology. Lentiviral packaging  
344 vectors pLP1, pLP2 and VSVG (Invitrogen, K4975) along with shDrp1 or shROCK1  
345 plasmid were co-transfected into 293FT cells using Lipofectamine 3000 (Invitrogen,  
346 L3000015) according to the manufacturer's instructions. After 48 h, lentivirus  
347 supernatant was harvested and transfected into the PC12 cells. The cells with stably

348 knockdown of Drp1 or ROCK1 were subsequently selected with 5 µg/ml puromycin  
349 (Sigma, P9620).

350

351 **Dopamine detection.** The cell culture supernatants treated with  
352 1-methyl-4-phenylpyridinium ion (MPP<sup>+</sup>) were carefully collected after centrifuging  
353 at 3000 rpm for 20 min. The dopamine concentrations were quantified using  
354 enzyme-linked immunosorbent assays (ELISA) following the manufacturer's  
355 instructions (Wuhan Colorful Gene Biological Technology, Wuhan, China).

356

357 **MTT assay.** An MTT assay was performed to determine the effects of MPP<sup>+</sup> on PC12  
358 cell viability. Briefly, cells were seeded in 96-well plates and treated with MPP<sup>+</sup>, and  
359 the MTT solutions (5 mg/ml, 3-[4,5-dimethylthiazol-2-yl]-2,5-diphenyltetrazolium  
360 bromide, Sigma, USA) were added and incubated for 4 h. Absorption was measured  
361 by microplate reader (Thermo, Varioskan Flash) at 570 nm. The cell viabilities were  
362 normalized to the control group (100%).

363

#### 364 **Mitochondrial membrane potential assay by JC-1 and rhodamine 123 staining**

365 The JC-1 kit (Beyotime Company, C2006) was used to measure the mitochondrial  
366 membrane potential according to the manufacturer's instructions. Briefly, the cells  
367 were seeded in 24-well plate. After treatment with MPP<sup>+</sup>, cells were incubated with  
368 1×JC-1 reagent solution for 15 min at 37 °C and washed twice with ice-cold 1×assay  
369 buffer. The cells incubated with carbonyl cyanide m-chlorophenylhydrazone

370 (protonophore, CCCP, 10  $\mu$ M) were used as the positive control. The fluorescence  
371 was observed by fluorescence microscopy (BX63, Olympus, Japan) and fluorescence  
372 intensity was calculated by ImageJ software (National Institutes of Health, USA). The  
373 fluorescence ratio of JC-1 aggregates (red) to JC-1 monomers (green) represents the  
374 mitochondrial membrane potential. The mitochondrial membrane potential was  
375 normalized to that of the control group (100%).

376 We also detected the mitochondrial membrane potential using rhodamine 123  
377 staining. Briefly, following MPP<sup>+</sup> treatment, cells were harvested and stained with 1  
378  $\mu$ M of rhodamine 123 in a 5% CO<sub>2</sub> incubator for 30 min at 37 °C in the dark.  
379 Subsequently, the cells were washed twice with ice-cold PBS. The fluorescence  
380 intensity was measured by microplate reader (Thermo, Varioskan Flash) at 507 nm of  
381 excitation wavelength and 529 nm of emission. Rhodamine 123 fluorescence was  
382 normalized to that in the control group (100%).

383

384 **Adenosine triphosphate (ATP) luminescence detection.** The firefly luciferase-based  
385 ATP Determination Kit (Beyotime Company, S2006) was used to measure ATP levels  
386 according to the manufacturer's instructions. Cells treated with various concentrations  
387 of MPP<sup>+</sup> were lysed and centrifuged, and ATP detection working solution was added  
388 to the supernatant. The luminescence value is an index of the ATP level by using a  
389 microplate reader (Thermo, Varioskan Flash). The ATP level was normalized to the  
390 control group (100%).

391

392 **Determination of apoptosis by flow cytometry.** Cells were harvested by trypsin  
393 digestion and centrifuged for washing with PBS twice. Subsequently, the cells were  
394 resuspended in 100  $\mu$ l 1 $\times$ binding buffer mixed with 5  $\mu$ L Annexin V-FITC and 10  $\mu$ l  
395 propidium iodide (PI) (BD Biosciences, 556547) and incubated for 15 min at 25 °C in  
396 the dark. The apoptosis cell rate was analyzed by flow cytometry (FACScan,  
397 Beckman MoFlo XDP).

398

399 **Western blot analysis.** Cells and tissues were lysed with cell lysis buffer containing 1  
400 mM PMSF. Mitochondrial and cytosolic fractions were extracted using the Cell  
401 Mitochondrial Isolation Kit (Beyotime Company, C3601). The concentrations of  
402 protein lysates were determined by BCA Protein Assay Kit (Beyotime Company,  
403 P0009). Then, 15-100  $\mu$ g of sample protein was separated using SDS-PAGE and  
404 transferred to PVDF membranes. The membranes were blocked with 5% fat-free dry  
405 milk and then incubated with primary antibodies overnight at 4 °C. The protein bands  
406 were then incubated with horseradish peroxidase (HRP)-conjugated goat anti-rabbit  
407 (KPL, 074-1516) or goat anti-mouse (KPL, 074-1802) secondary antibody for 2 h at  
408 25 °C and subsequently visualized by enhanced chemiluminescence reagent (Bio-Rad,  
409 170-5061).

410

411 **Immunofluorescence.** Cells were plated on coverslips and then transfected with  
412 DsRed-Mito plasmid (Clontech Laboratories, Inc., PT3633-5) for 48 h using  
413 Lipofectamine 3000 (Invitrogen, L3000015). After treatment with MPP<sup>+</sup>, cells were

414 fixed with 4% paraformaldehyde for 15 min and the mitochondria morphology was  
415 viewed under a LSM780 confocal laser scanning microscope (Zeiss, Germany).  
416 Mitochondrial length of at least randomly selected 10 cells were measured using  
417 Imaris software (version: 7.4.2) (Bitplane, Zurich, Switzerland).

418

419 **Animals and treatment.** All animal experiments were conducted with an approval  
420 from the Animal Care and Use Committee of Army Medical University. MPTP was  
421 used to establish a PD mouse model<sup>44,45</sup>. Male 8-week C57BL/6 mice (20-25 g) were  
422 randomly divided into 4 groups: control, MPTP, Y-27632, or Y-27632+MPTP (8  
423 mice per group). The MPTP group and Y-27632 group were intraperitoneally (i.p.)  
424 injected with MPTP at a dose of 30 mg/kg/day and Y-27632 at a dose of 5 mg/kg/day  
425 once a day for 5 consecutive days, respectively<sup>46</sup>. The Y-27632+MPTP group mice,  
426 30 min after injection of Y-27632 (5 mg/kg/day) 30 min, were injected with a dose of  
427 MPTP (30 mg/kg/day). The mice in the control group were injected with an equal  
428 volume of vehicle on the same schedule. On the 7th day after the last injection of  
429 MPTP, the mice were anesthetized with chloral hydrate (0.4 ml/100 g, i.p.). The mice  
430 were transcardially perfused with saline, followed by 4% paraformaldehyde. The  
431 brain was removed, immersion-fixed in 4% paraformaldehyde overnight, and  
432 dehydrated for 48 h with 30 % sucrose solution at 4 °C. The dehydrated brain tissues  
433 were coronally sectioned encompassing the entire substantia nigra pars compacta  
434 (SNpc) of the midbrain and striatum for immunofluorescence and  
435 immunohistochemical analysis. For western blot analysis, mice were euthanized

436 under anesthesia with chloral hydrate, and brain tissues were quickly removed. SNpc  
437 of midbrain and striatum were dissected on ice.

438

439 **Rotarod test.** During the test, mice were placed on the rotarod (IITC Life Science,  
440 Series 8). Mice were pretrained for 3 days prior to the test. The training consisted of  
441 three consecutive runs gradually increasing from 5 rpm for 30 s up to a maximum 40  
442 rpm in 5 min<sup>45</sup>. Each trial continued until the mice were unable to remain on the rod  
443 without falling for up to 120 s<sup>45</sup>. The latency (time) until the mice fell from the  
444 rotarod was recorded and the average time of three tests was analyzed for statistical  
445 analyses.

446

447 **Statistical analysis.** Data are expressed as the mean  $\pm$ S.D. from at least three  
448 independent experiments. The statistical analysis was performed using one-way  
449 analysis of variance (ANOVA) with Dunnett test or Tukey by GraphPad Prism 5.0  
450 statistical analysis software. The significance of differences between two groups was  
451 evaluated using t-tests. \* $P < 0.05$ , \*\* $P < 0.01$  or \*\*\* $P < 0.001$  were regarded as a  
452 statistically significant difference.

453

454 **Data availability.** The original immunoblots gels are provided as Supplementary Figs  
455 1–6. The authors declare that all the data supporting the findings of this study are  
456 available within the article (or the Supplementary Information) from the  
457 corresponding author on reasonable request.

458 **Acknowledgments.** This work was supported by the National Natural Science  
459 Foundation of China (Grant No. 31600806 and 81703481), Chongqing Natural  
460 Science Foundation Program (Grant No. cstc2015shmszx120078) and Clinical  
461 Research Projects of second Affiliated Hospital, Army Medical University (Grant No.  
462 2016YLC12).

463

464 **Author contributions.** Q.Z., C.H., J.H., G.L. and R.Z. designed experiments; Q.Z.,  
465 C.H., J.H., W.L., W.L., F.L., Q.T. and Y.L. performed all experiments; Q.Z., C.H., J.H.,  
466 Q.W., M.Z. and F.S. analyzed the data; Q.Z., G.L. and R.Z. wrote the paper.

467

468 **Conflict of interest.** The authors declare no competing financial interests.

469

## 470 References

- 471 1. Zou, Y. M., Liu, J., Tian, Z. Y. et al. Systematic review of the prevalence and incidence of  
472 Parkinson's disease in the People's Republic of China. *Neuropsychiatr. Dis. Treat.* **11**, 1467-1472  
473 (2015).
- 474 2. Katzenschlager, R. & Lees, A. J. Treatment of Parkinson's disease: levodopa as the first choice. *J.*  
475 *Neurol.* **249 Suppl 2**, II19-24 (2002).
- 476 3. Cacabelos, R. Parkinson's Disease: From Pathogenesis to Pharmacogenomics. *Int J Mol Sci* **18**  
477 (2017).
- 478 4. Giannoccaro, M. P., La Morgia, C., Rizzo, G. et al. Mitochondrial DNA and primary  
479 mitochondrial dysfunction in Parkinson's disease. *Mov. Disord.* **32**, 346-363 (2017).
- 480 5. Rappold, P. M., Cui, M., Grima, J. C. et al. Drp1 inhibition attenuates neurotoxicity and  
481 dopamine release deficits in vivo. *Nature Communications* **5** (2014).
- 482 6. Vives-Bauza, C., Tocilescu, M., de Vries, R. L. A. et al. Control of mitochondrial integrity in  
483 Parkinson's disease. *Recent Advances in Parkinsons Disease: Basic Research* **183**, 99-113 (2010).
- 484 7. Ishihara, N., Otera, H., Oka, T. et al. Regulation and Physiologic Functions of GTPases in  
485 Mitochondrial Fusion and Fission in Mammals. *Antioxidants & Redox Signaling* **19**, 389-399  
486 (2013).
- 487 8. Inoue, N., Ogura, S., Kasai, A. et al. Knockdown of the mitochondria-localized protein p13  
488 protects against experimental parkinsonism. *EMBO Rep* (2018).
- 489 9. Wang, W. Z., Wang, X. L., Fujioka, H. et al. Parkinson's disease-associated mutant VPS35 causes  
490 mitochondrial dysfunction by recycling DLP1 complexes. *Nat. Med.* **22**, 54-+ (2016).
- 491 10. Burte, F., Carelli, V., Chinnery, P. F. et al. Disturbed mitochondrial dynamics and  
492 neurodegenerative disorders. *Nature Reviews Neurology* **11**, 11-24 (2015).
- 493 11. Wang, X., Yan, M. H., Fujioka, H. et al. LRRK2 regulates mitochondrial dynamics and function  
494 through direct interaction with DLP1. *Hum. Mol. Genet.* **21**, 1931-1944 (2012).
- 495 12. Wang, X. L., Su, B., Liu, W. H. et al. DLP1-dependent mitochondrial fragmentation mediates  
496 1-methyl-4-phenylpyridinium toxicity in neurons: implications for Parkinson's disease. *Aging Cell*  
497 **10**, 807-823 (2011).
- 498 13. Wang, J. X., Li, Q. & Li, P. F. Apoptosis Repressor with Caspase Recruitment Domain  
499 Contributes to Chemotherapy Resistance by Abolishing Mitochondrial Fission Mediated by  
500 Dynamin-Related Protein-1. *Cancer Res.* **69**, 492-500 (2009).
- 501 14. Tanaka, A. & Youle, R. J. A chemical inhibitor of DRP1 uncouples mitochondrial fission and  
502 apoptosis. *Mol. Cell* **29**, 409-410 (2008).
- 503 15. Estaquier, J. & Arnoult, D. Inhibiting Drp1-mediated mitochondrial fission selectively prevents  
504 the release of cytochrome c during apoptosis. *Cell Death Differ.* **14**, 1086-1094 (2007).
- 505 16. Frank, S., Gaume, B., Bergmann-Leitner, E. S. et al. The role of dynamin-related protein 1, a  
506 mediator of mitochondrial fission, in apoptosis. *Dev. Cell* **1**, 515-525 (2001).
- 507 17. Wei, L., Surma, M., Shi, S. et al. Novel Insights into the Roles of Rho Kinase in Cancer. *Arch.*  
508 *Immunol. Ther. Exp. (Warsz.)* **64**, 259-278 (2016).
- 509 18. Vemula, S., Shi, J. J., Hanneman, P. et al. ROCK1 functions as a suppressor of inflammatory cell  
510 migration by regulating PTEN phosphorylation and stability. *Blood* **115**, 1785-1796 (2010).
- 511 19. Li, G. B., Zhou, J., Budhraj, A. et al. Mitochondrial translocation and interaction of cofilin and  
512 Drp1 are required for erucin-induced mitochondrial fission and apoptosis. *Oncotarget* **6**,



- 513 1834-1849 (2015).
- 514 20. He, Q., Li, Y. H., Guo, S. S. et al. Inhibition of Rho-kinase by Fasudil protects dopamine neurons  
515 and attenuates inflammatory response in an intranasal lipopolysaccharide-mediated Parkinson's  
516 model. *Eur. J. Neurosci.* **43**, 41-52 (2016).
- 517 21. Borrajo, A., Rodriguez-Perez, A. I., Villar-Cheda, B. et al. Inhibition of the microglial response is  
518 essential for the neuroprotective effects of Rho-kinase inhibitors on MPTP-induced dopaminergic  
519 cell death. *Neuropharmacology* **85**, 1-8 (2014).
- 520 22. Singleterry, J., Sreedhar, A. & Zhao, Y. F. Components of cancer metabolism and therapeutic  
521 interventions. *Mitochondrion* **17**, 50-55 (2014).
- 522 23. Brandon, M., Baldi, P. & Wallace, D. C. Mitochondrial mutations in cancer. *Oncogene* **25**,  
523 4647-4662 (2006).
- 524 24. Skulachev, V. P. Mitochondrial physiology and pathology; concepts of programmed death of  
525 organelles, cells and organisms. *Mol. Aspects Med.* **20**, 139-184 (1999).
- 526 25. Pokorny, J., Pokorny, J., Kobilkova, J. et al. Targeting mitochondria for cancer treatment - two  
527 types of mitochondrial dysfunction. *Prague Med. Rep.* **115**, 104-119 (2014).
- 528 26. Safe, S. Targeting Apoptosis Pathways in Cancer-Letter. *Cancer Prev Res* **8**, 338-338 (2015).
- 529 27. Murugan, C., Rayappan, K., Thangam, R. et al. Combinatorial nanocarrier based drug delivery  
530 approach for amalgamation of anti-tumor agents in bresat cancer cells: an improved nanomedicine  
531 strategies. *Sci. Rep.* **6**, 34053 (2016).
- 532 28. Adams, J. M. & Cory, S. The Bcl-2 apoptotic switch in cancer development and therapy.  
533 *Oncogene* **26**, 1324-1337 (2007).
- 534 29. Sheridan, C. & Martin, S. J. Mitochondrial fission/fusion dynamics and apoptosis. *Mitochondrion*  
535 **10**, 640-648 (2010).
- 536 30. Perfettini, J. L., Roumier, T. & Kroemer, G. Mitochondrial fusion and fission in the control of  
537 apoptosis. *Trends Cell Biol.* **15**, 179-183 (2005).
- 538 31. Otera, H. & Mihara, K. Molecular mechanisms and physiologic functions of mitochondrial  
539 dynamics. *J. Biochem.* **149**, 241-251 (2011).
- 540 32. Knott, A. B., Perkins, G., Schwarzenbacher, R. et al. Mitochondrial fragmentation in  
541 neurodegeneration. *Nature Reviews Neuroscience* **9**, 505-518 (2008).
- 542 33. Kang, J. H., Jiang, Y., Toita, R. et al. Phosphorylation of Rho-associated kinase  
543 (Rho-kinase/ROCK/ROK) substrates by protein kinases A and C. *Biochimie* **89**, 39-47 (2007).
- 544 34. Tieu, K. A guide to neurotoxic animal models of Parkinson's disease. *Cold Spring Harb. Perspect.*  
545 *Med.* **1**, a009316 (2011).
- 546 35. Davis, G. C., Williams, A. C., Markey, S. P. et al. Chronic Parkinsonism secondary to  
547 intravenous injection of meperidine analogues. *Psychiatry Res.* **1**, 249-254 (1979).
- 548 36. Langston, J. W., Ballard, P., Tetrud, J. W. et al. Chronic Parkinsonism in humans due to a product  
549 of meperidine-analog synthesis. *Science* **219**, 979-980 (1983).
- 550 37. Haque, M. E., Thomas, K. J., D'Souza, C. et al. Cytoplasmic Pink1 activity protects neurons from  
551 dopaminergic neurotoxin MPTP. *Proc. Natl. Acad. Sci. U. S. A.* **105**, 1716-1721 (2008).
- 552 38. Chang, C. R. & Blackstone, C. Dynamic regulation of mitochondrial fission through modification  
553 of the dynamin-related protein Drp1. *Mitochondrial Research in Translational Medicine* **1201**,  
554 34-39 (2010).
- 555 39. Cereghetti, G. M., Stangherlin, A., Martins de Brito, O. et al. Dephosphorylation by calcineurin  
556 regulates translocation of Drp1 to mitochondria. *Proc. Natl. Acad. Sci. U. S. A.* **105**, 15803-15808

- 557 (2008).
- 558 40. Li, G. B., Fu, R. Q., Shen, H. M. et al. Polyphyllin I induces mitophagic and apoptotic cell death  
559 in human breast cancer cells by increasing mitochondrial PINK1 levels. *Oncotarget* **8**,  
560 10359-10374 (2017).
- 561 41. Julian, L. & Olson, M. F. Rho-associated coiled-coil containing kinases (ROCK): structure,  
562 regulation, and functions. *Small GTPases* **5**, e29846 (2014).
- 563 42. Lochhead, P. A., Wickman, G., Mezna, M. et al. Activating ROCK1 somatic mutations in human  
564 cancer. *Oncogene* **29**, 2591-2598 (2010).
- 565 43. Tsai, N. P. & Wei, L. N. RhoA/ROCK1 signaling regulates stress granule formation and  
566 apoptosis. *Cell. Signal.* **22**, 668-675 (2010).
- 567 44. Santos, D. B., Colle, D., Moreira, E. L. et al. Succinobucol, a Non-Statin Hypocholesterolemic  
568 Drug, Prevents Premotor Symptoms and Nigrostriatal Neurodegeneration in an Experimental  
569 Model of Parkinson's Disease. *Mol. Neurobiol.* **54**, 1513-1530 (2017).
- 570 45. Guo, B., Hu, S., Zheng, C. et al. Substantial protection against MPTP-associated Parkinson's  
571 neurotoxicity in vitro and in vivo by anti-cancer agent SU4312 via activation of MEF2D and  
572 inhibition of MAO-B. *Neuropharmacology* **126**, 12-24 (2017).
- 573 46. Villar-Cheda, B., Dominguez-Meijide, A., Joglar, B. et al. Involvement of microglial  
574 RhoA/Rho-kinase pathway activation in the dopaminergic neuron death. Role of angiotensin via  
575 angiotensin type 1 receptors. *Neurobiol. Dis.* **47**, 268-279 (2012).

576

577

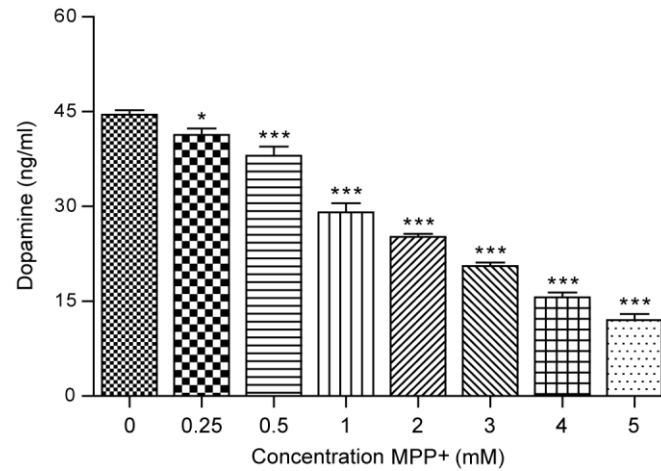

578

579 **Fig. 1** MPP<sup>+</sup> inhibits dopamine release in PC12 cells. PC12 cells were treated with  
580 MPP<sup>+</sup> (0, 0.25, 0.5, 1, 2, 3, 4 and 5 mM) for 24 h. The release levels of dopamine  
581 were measured using ELISA. The data are expressed as the mean  $\pm$  S.D. (n = 3). \**P* <  
582 0.05, \*\*\**P* < 0.001 vs. the control group.

583

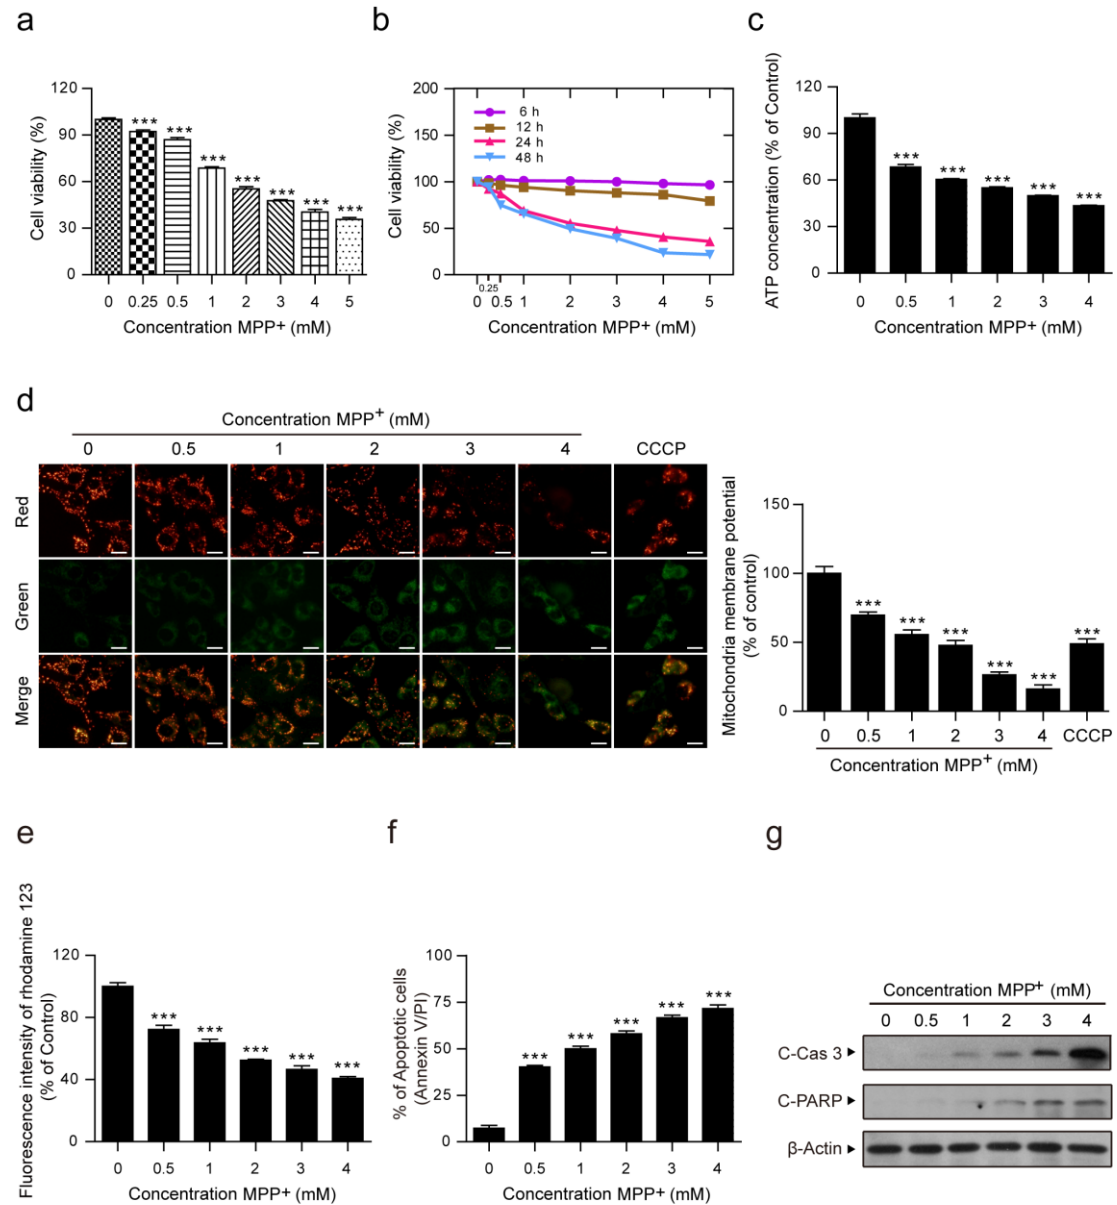

584

585 **Fig. 2** MPP<sup>+</sup> induces mitochondria-dependent apoptosis in PC12 cells. PC12 cells

586 were treated with various concentrations of MPP<sup>+</sup> (0, 0.25, 0.5, 1, 2, 3, 4 and 5 mM)

587 for 24 h (a) or at different time intervals (b), and the viability of PC12 cells was

588 measured by MTT assays. c PC12 cells were treated with MPP<sup>+</sup> (0, 0.5, 1, 2, 3, and 4

589 mM) for 24 h and the concentrations of ATP were determined using an ATP

590 Determination Kit. d Mitochondrial membrane potential was measured by JC-1

591 staining. CCCP (10 μM) was used as the positive control. Scale bars: 20 μm. The

592 fluorescence intensity ratio of JC-1 aggregates (red) to JC-1 monomers (green)  
593 represents the mitochondrial membrane potential. **e** Rhodamine 123 fluorescence  
594 intensity was detected by microplate reader. **f** The apoptosis cell rate was measured by  
595 flow cytometry using Annexin V-FITC/PI staining. **g** The expression of Cleaved  
596 Caspase 3 (C-Cas 3) and Cleaved PARP (C-PARP) in whole-cell lysates was  
597 determined by western blot analysis. The data are expressed as the means  $\pm$  S.D. (n =  
598 3). \*\*\* $P < 0.001$  vs. the control group.  
599

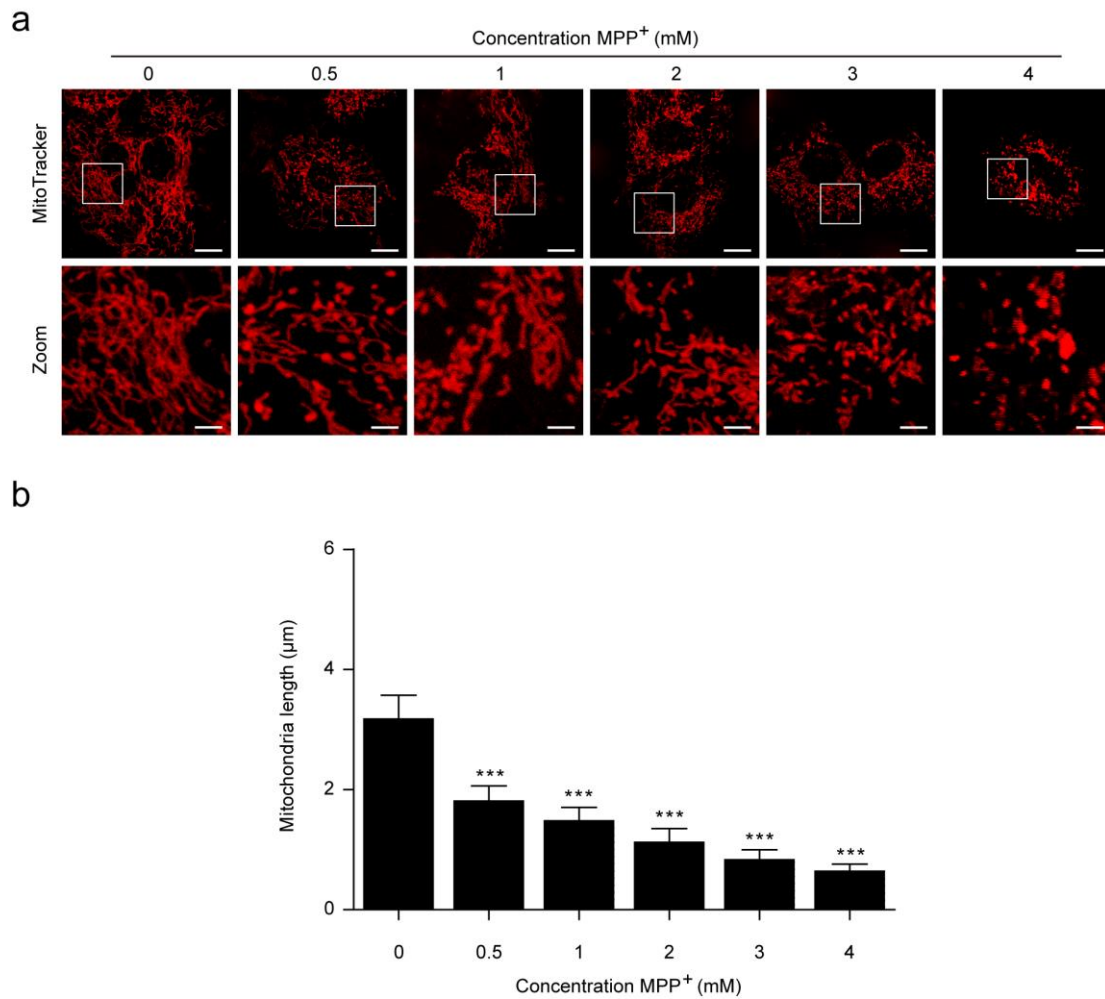

600

601 **Fig. 3** MPP<sup>+</sup> induces aberrant mitochondrial fission in PC12 cells. **a** Cells were

602 transfected with DsRed-Mito plasmid and the mitochondria morphology was viewed

603 by confocal microscopy. Scale bars: 10  $\mu\text{m}$ . **b** Quantifications of mitochondrial length

604 were measured by Imaris software. The data are expressed as the means  $\pm$  S.D. (n = 3).

605 \*\*\* $P < 0.001$  vs. the control group.

606

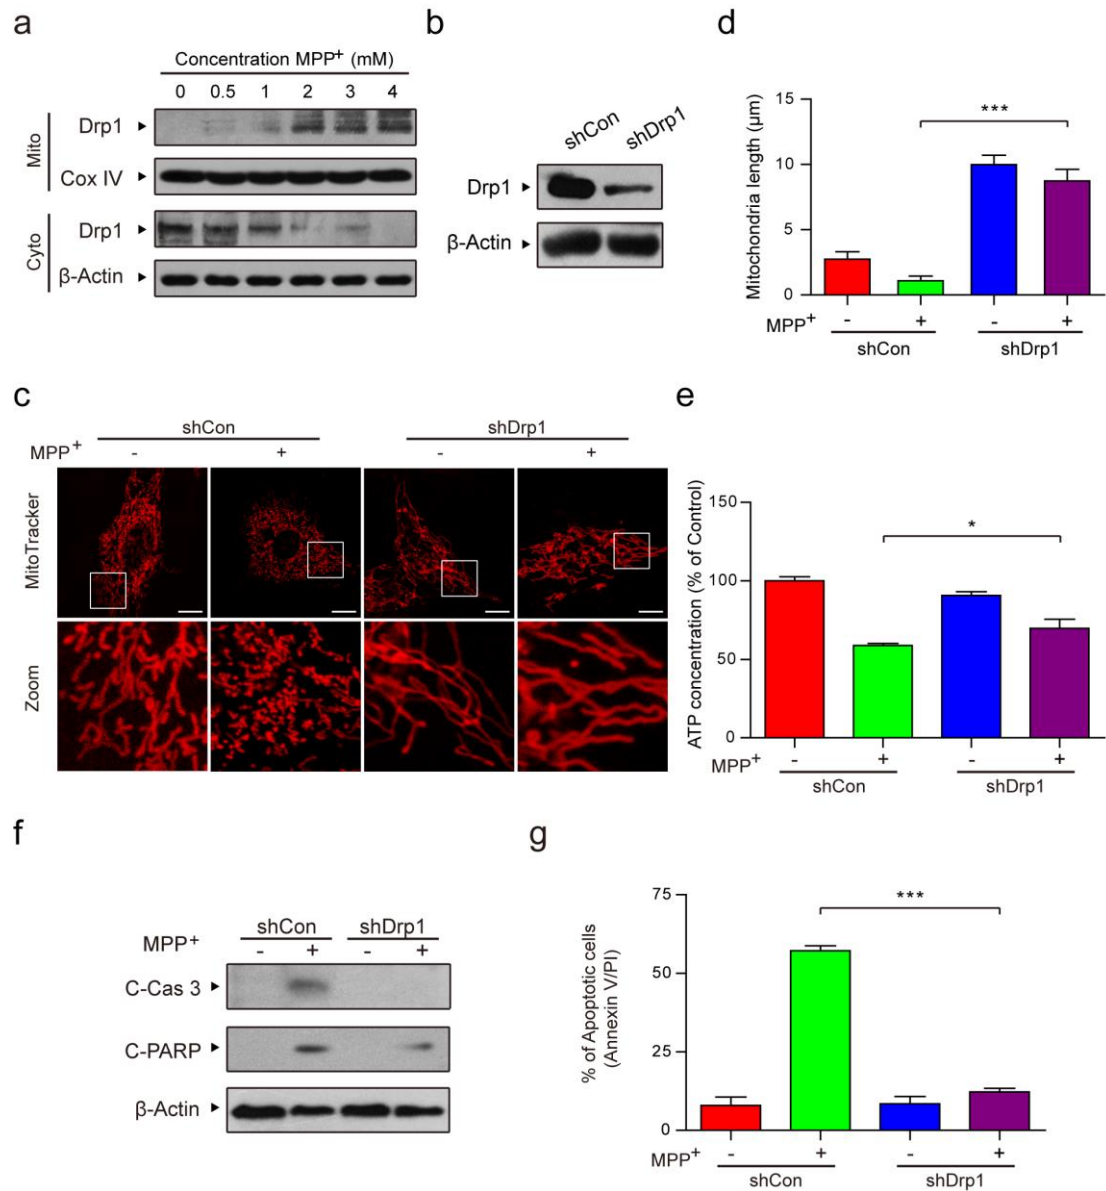

607

608 **Fig. 4** MPP<sup>+</sup> induces Drp1-dependent aberrant mitochondrial fission and apoptosis. **a**

609 PC12 cells were treated with various concentrations of MPP<sup>+</sup> (0, 0.5, 1, 2, 3, and 4

610 mM) for 24 h. The expression of Drp1 in mitochondrial lysates (Mito) and in

611 cytosolic fractions (Cyto) was determined by western blot analysis. **b** Stably

612 expressed Non-Target shRNA (shCon) or Drp1 shRNA (shDrp1) PC12 cells were

613 confirmed by western blot analysis. **c** Cells were transfected with DsRed-Mito

614 plasmid and the mitochondria morphology was viewed by confocal microscopy. Scale

615 bars: 10 µm. **d** Quantifications of mitochondrial length were performed using Imaris

616 software. **e** The concentrations of ATP were determined using an ATP Determination  
617 Kit. **f** The expression of C-Cas 3 and C-PARP in whole-cell lysates was determined by  
618 western blot analysis. **g** The apoptosis cell rate was measured by flow cytometry using  
619 Annexin V-FITC/PI staining. The data are expressed as the means  $\pm$  S.D. ( $n = 3$ ).  $*P <$   
620  $0.05$ ,  $***P < 0.001$ .

621



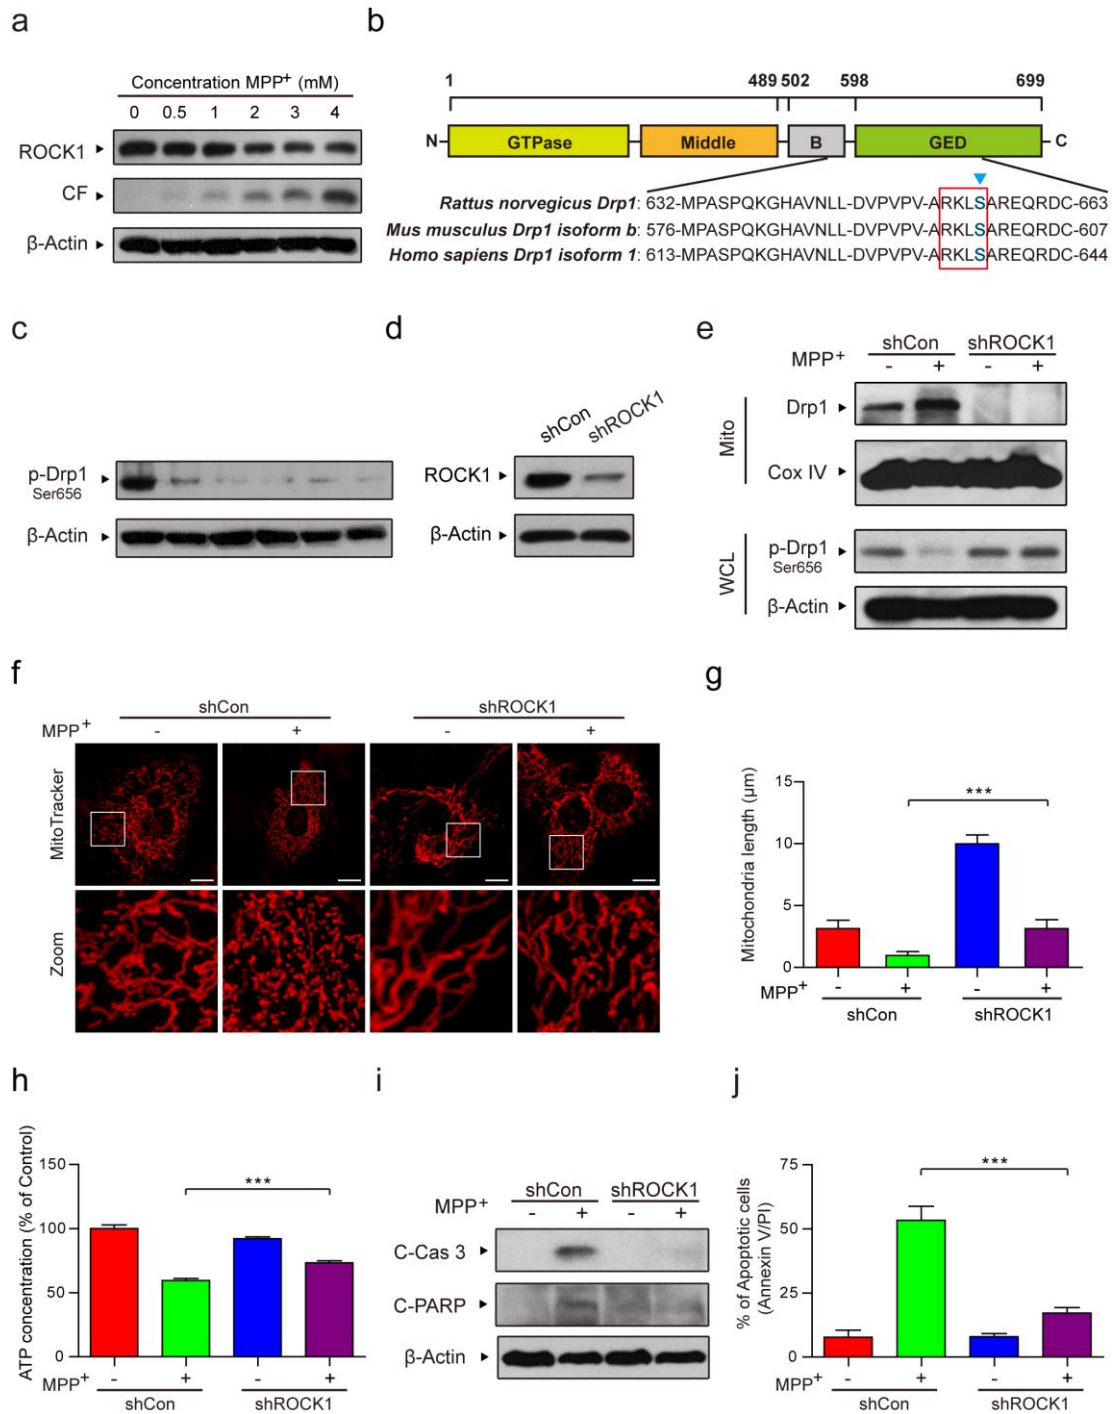

622

623 **Fig. 5** ROCK1 activation is involved in MPP<sup>+</sup>-induced aberrant mitochondrial fission

624 and apoptosis through dephosphorylation/activation of Drp1. **a** PC12 cells were

625 treated with various concentrations of MPP<sup>+</sup> (0, 0.5, 1, 2, 3, and 4 mM) for 24 h. The

626 expression of ROCK1, cleaved ROCK1 and p-Drp1 (Ser 656) in whole-cell lysates

627 was determined by western blot analysis. CF represents the cleavage fragment of

628 ROCK1. **b** Domain structure of rat Drp1. Sequences from several Drp1 isoforms were  
629 aligned to show the conserved motifs. **c** The expression of p-Drp1 (Ser 656) in  
630 whole-cell lysates was determined by western blot analysis. **d** Stably expressed shCon  
631 or ROCK1 shRNA (shROCK1) PC12 cells were confirmed by western blot analysis. **e**  
632 The expression of Drp1 in mitochondrial lysates (Mito) and p-Drp1 (Ser 656) in  
633 whole-cell lysates (WCL) was determined by western blot analysis. **f** Cells were  
634 transfected with DsRed-Mito plasmid and the mitochondria morphology was viewed  
635 by confocal microscopy. Scale bars: 10  $\mu\text{m}$ . **g** Quantifications of mitochondrial length  
636 were performed using Imaris software. **h** The concentrations of ATP were determined  
637 using an ATP Determination Kit. **i** The expression of C-Cas 3 and C-PARP in  
638 whole-cell lysates was determined by western blot analysis. **j** The apoptosis cell rate  
639 was measured by flow cytometry using Annexin V-FITC/PI staining. The data are  
640 expressed as the means  $\pm$  S.D. (n = 3). \*\*\* $P < 0.001$ .  
641

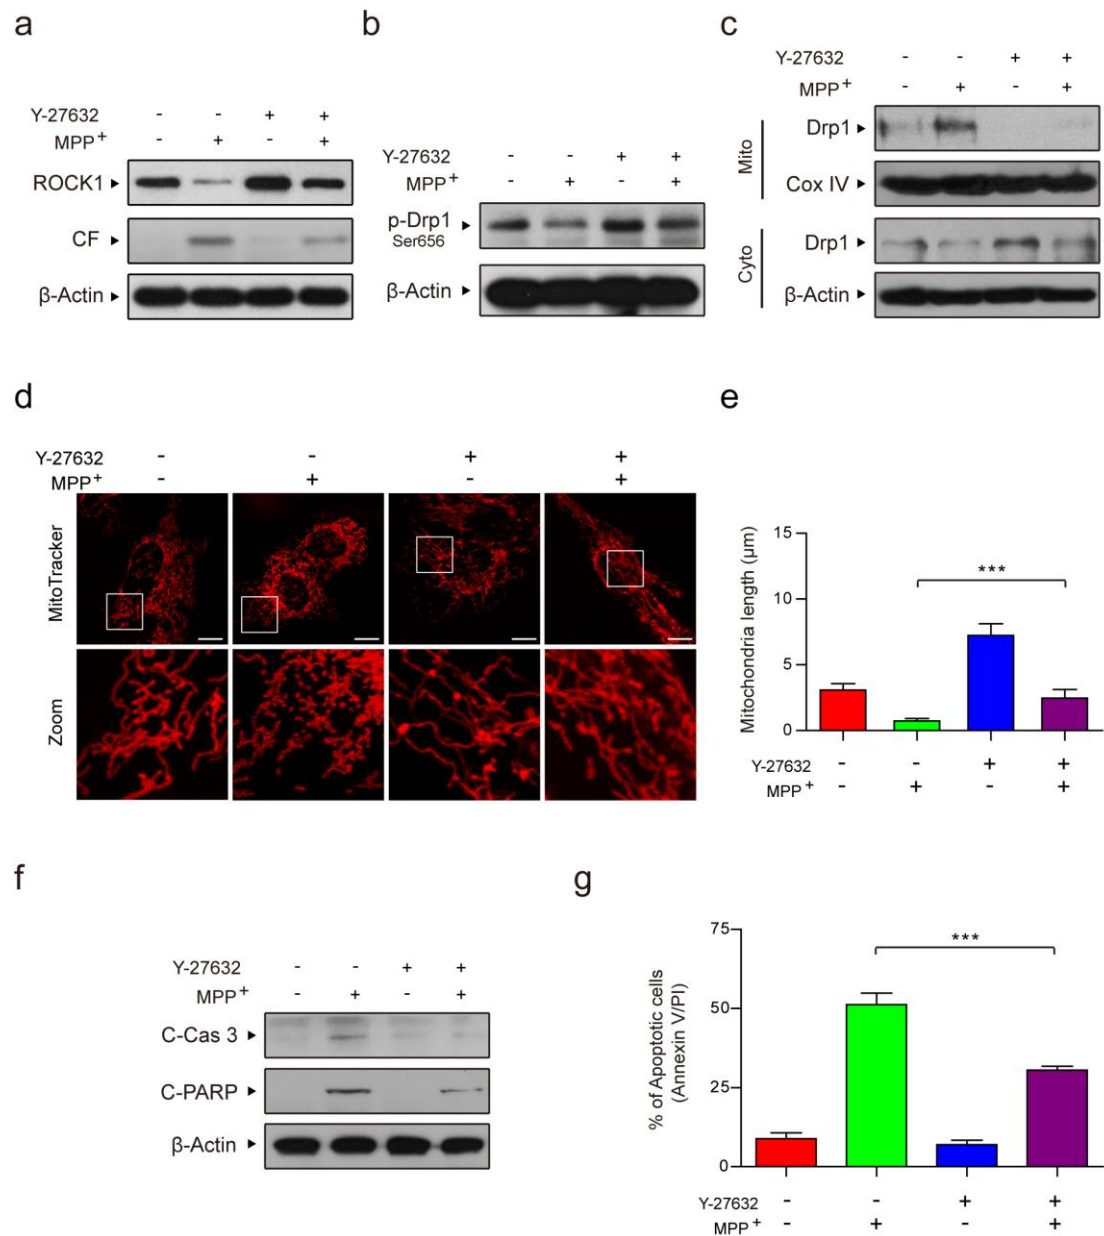

642

643 **Fig. 6** ROCK1 activation inhibitor Y-27632 attenuates MPP<sup>+</sup>-induced Drp1-dependent

644 aberrant mitochondrial fission and apoptosis through inhibition of Drp1

645 dephosphorylation/activation. **a** PC12 cells were pretreated with ROCK1 activation

646 inhibitor Y-27632 (50 μM) for 2 h, followed by 1 mM MPP<sup>+</sup> for 24 h. The expression

647 of ROCK1 and cleaved ROCK1 in whole-cell lysates was determined by western blot

648 analysis. **b** The expression of p-Drp1 (Ser 656) was determined by western blot

649 analysis. **c** The expression of Drp1 in mitochondrial lysates (Mito) and in cytosolic

650 fractions (Cyto) was determined by western blot analysis. **d** Cells were transfected  
651 with DsRed-Mito plasmid and the mitochondria morphology was viewed by confocal  
652 microscopy. Scale bars: 10  $\mu\text{m}$ . **e** Quantifications of mitochondrial length were  
653 measured by Imaris software. **f** The expression of Cleaved Caspase 3 (C-Cas 3) and  
654 Cleaved PARP (C-PARP) in whole-cell lysates was performed using by western blot  
655 analysis. **g** The apoptosis cell rate was measured by flow cytometry using Annexin  
656 V-FITC/PI staining. The data are expressed as the means  $\pm$  S.D. (n = 3). \*\*\* $P < 0.001$ .  
657

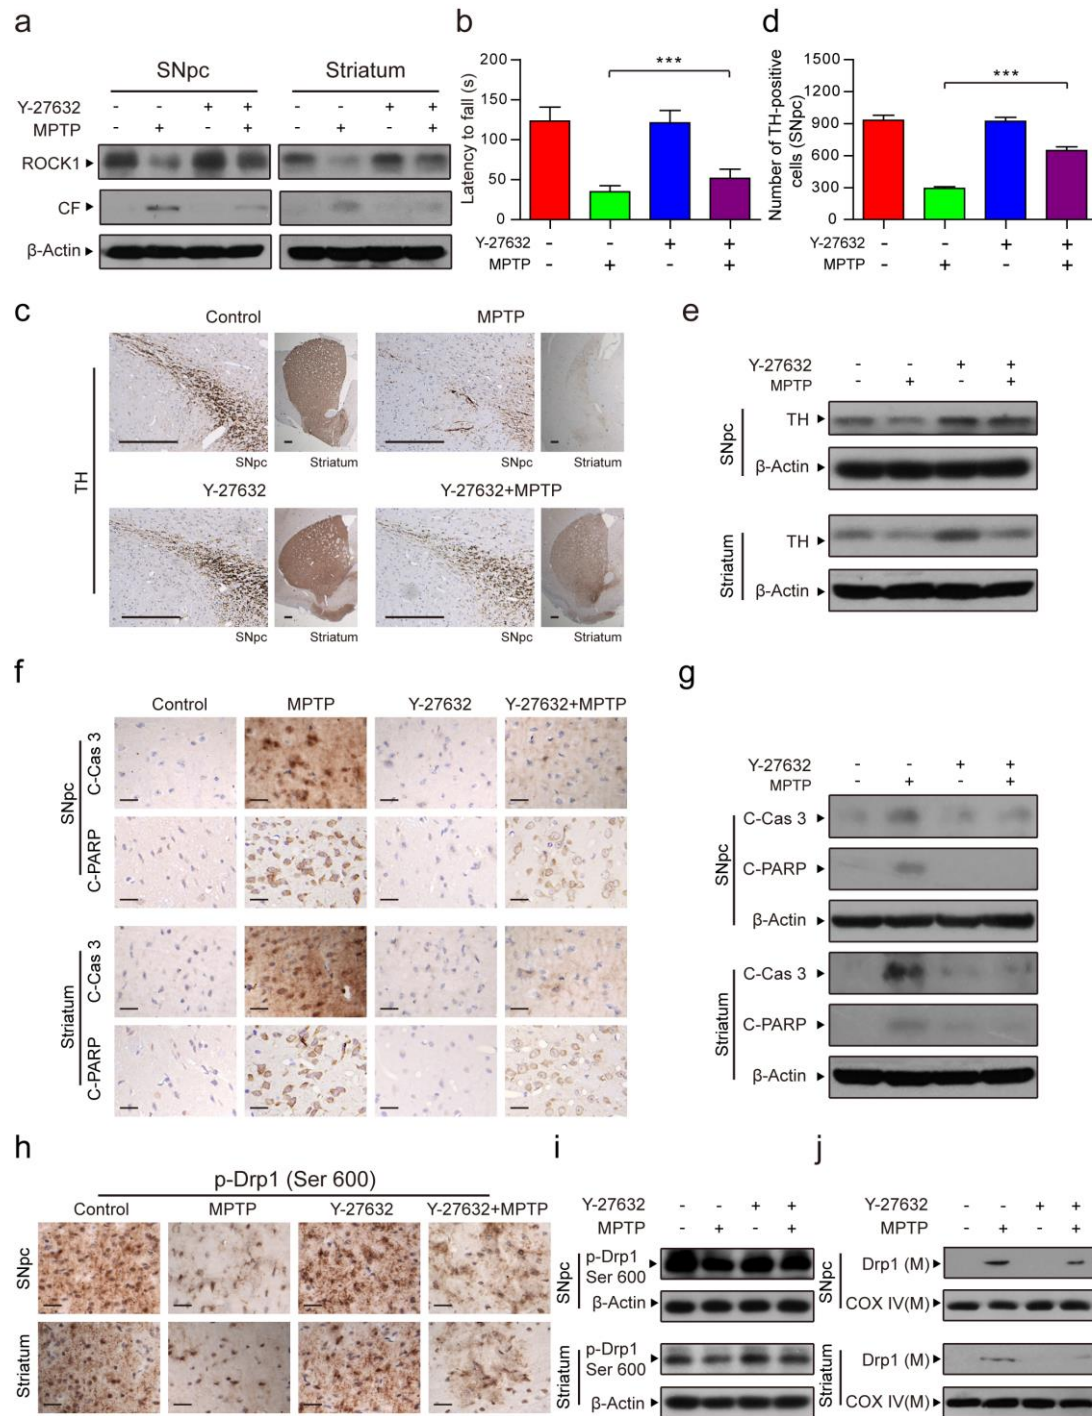

658

659 **Fig. 7** ROCK1 activation inhibitor Y-27632 improves symptoms of MPTP-induced  
 660 PD mouse through inhibiting Drp1-dependent aberrant mitochondrial fission and  
 661 dopaminergic nerve cell apoptosis. **a** The substantia nigra pars compacta (SNpc) of  
 662 the midbrain and the striatum were prepared and subjected to detect the expression of  
 663 ROCK1 and cleaved ROCK1 using western blot analysis. **b** The latency (time) to fall

664 from the rotarod was recorded. **c** SNpc and striatum from each group were fixed,  
665 dehydrated and subjected to tyrosine hydroxylase (TH, as a marker for dopamine  
666 nerve cell) staining for immunohistochemical analysis. Scale bars: 200  $\mu\text{m}$ . **d** The  
667 number of TH-positive dopaminergic nerve cells was measured by Adobe Photoshop  
668 CC. **e** The expression of TH in SNpc and striatum was determined by western blot  
669 analysis. **f** Immunohistochemistry staining of C-Cas 3 and C-PARP of SNpc and  
670 striatum are showed. Scale bars: 20  $\mu\text{m}$ . **g** The expression of C-Cas 3 and C-PARP  
671 was determined by western blot analysis. **h** SNpc and striatum from each group were  
672 subjected to p-Drp1 (Ser 600) staining for immunohistochemical analysis. Scale bars:  
673 20  $\mu\text{m}$ . **i** The expression of p-Drp1 (Ser 600) was also determined by western blot  
674 analysis. **j** The expression of Drp1 in mitochondrial lysates (M) was determined by  
675 western blot analysis. The data are expressed as the means  $\pm$  S.D. ( $n = 3$ ). \*\*\* $P <$   
676 0.001.  
677
